# Supplementary material for: Nitrate-nitrogen dynamics in response to forestry harvesting and climate variability: 4 years of UV nitrate sensor data in a shallow gravel aquifer
Source: Copernicus journal article supplement (doi:10.5194/hess-29-2765-2025), 2025-07-03
Supplement: Supplementary file 1 [file hess-29-2765-2025-supplement.zip]

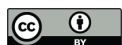

*Supplement of*

**Nitrate-nitrogen dynamics in response to forestry harvesting and climate variability: 4 years of UV nitrate sensor data in a shallow gravel aquifer**

**Ben Wilkins et al.**

*Correspondence to:* Ben Wilkins (ben.wilkins@ecan.govt.nz)

- hess-29-2765-2025-supplement-title-page.pdf
- Figure S1.png

The copyright of individual parts of the supplement might differ from the article licence.
